# Supplementary material for: Modeling the Wintering Habitat Distribution of the Black Stork in Shaanxi, China: A Hierarchical Integration of Climate and Land Use/Land Cover Data
Source: MDPI journal article supplement (doi:10.3390/ani13172726), 2023-08-27
Supplement: s1 [file s1]

**Table S1.** Usage and sources of environmental factors used in models

| Data type                                 | Environmental variables (Unit)                | Modelling usage | Source                                                                                                                 |
|-------------------------------------------|-----------------------------------------------|-----------------|------------------------------------------------------------------------------------------------------------------------|
| Climatic data                             | Isothermality (-)                             | SDMs            | <a href="https://www.worldclim.org/">https://www.worldclim.org/</a>                                                    |
|                                           | Mean temperature of driest quarter (°C)       | SDMs            |                                                                                                                        |
|                                           | Precipitation seasonality (-)                 | SDMs            |                                                                                                                        |
|                                           | Precipitation of driest month (mm)            | SDMs            |                                                                                                                        |
|                                           | Annual mean temperature                       | PLUS            |                                                                                                                        |
|                                           | Annual precipitation                          | PLUS            |                                                                                                                        |
| Natural Environment data                  | Elevation (m)                                 | SDMs, PLUS      | Geospatial Data Cloud<br><a href="http://www.gscloud.cn">http://www.gscloud.cn</a>                                     |
|                                           | Aspect (°)                                    | SDMs            |                                                                                                                        |
|                                           | Slope (°)                                     | SDMs            |                                                                                                                        |
|                                           | Soil type (-)                                 | PLUS            | Resource and Environmental Science and Data Center<br><a href="https://www.resdc.cn/">https://www.resdc.cn/</a>        |
|                                           | Distance to river (m)                         | SDMs            |                                                                                                                        |
|                                           | LULC (2000, 2010, 2020) (-)                   | SDMs, PLUS      |                                                                                                                        |
| Human interference and socioeconomic data | Population density (persons/km <sup>2</sup> ) | PLUS            | Resource and Environmental Science and Data Center (2015)<br><a href="https://www.resdc.cn/">https://www.resdc.cn/</a> |
|                                           | GDP (ten thousand Yuan/km <sup>2</sup> )      | PLUS            |                                                                                                                        |
|                                           | Nightlight (-)                                | PLUS            |                                                                                                                        |
|                                           | Distance to primary road (m)                  | PLUS            | National Geomatic Center of China (2015)<br><a href="http://www.ngcc.cn/ngcc/">http://www.ngcc.cn/ngcc/</a>            |
|                                           | Distance to secondary road (m)                | PLUS            |                                                                                                                        |
|                                           | Distance to highway (m)                       | SDMs, PLUS      |                                                                                                                        |
|                                           | Distance to railway (m)                       | PLUS            |                                                                                                                        |
|                                           | Distance to prefectural center (m)            | PLUS            |                                                                                                                        |
|                                           | Distance to county center (m)                 | PLUS            |                                                                                                                        |
|                                           | Distance to residential area (m)              | PLUS            |                                                                                                                        |

SDMs: Species Distribution models, PLUS: Patch-generating Land Use Simulation

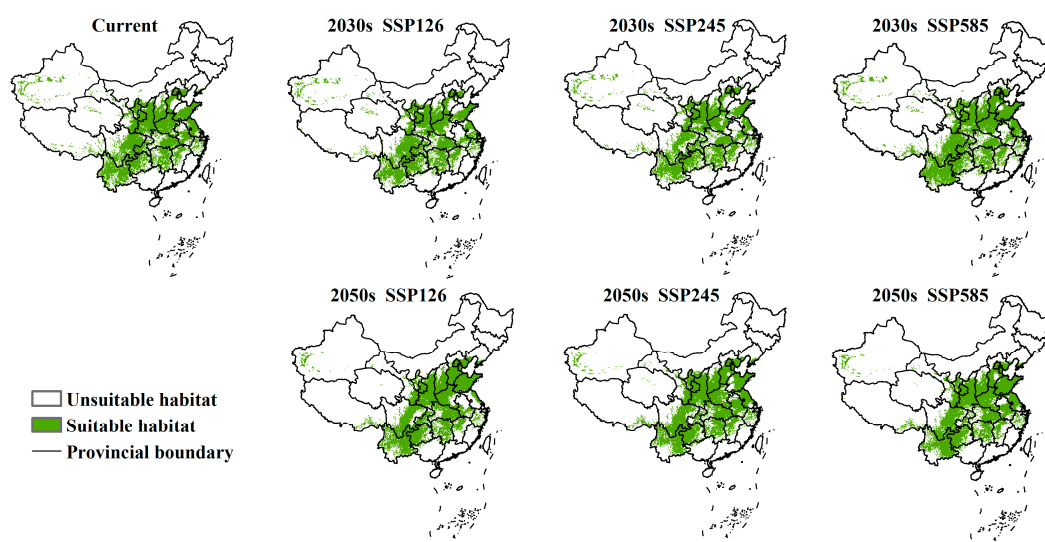

**Figure S1.** Distribution patterns of suitable habitat for wintering black stork derived from the national model

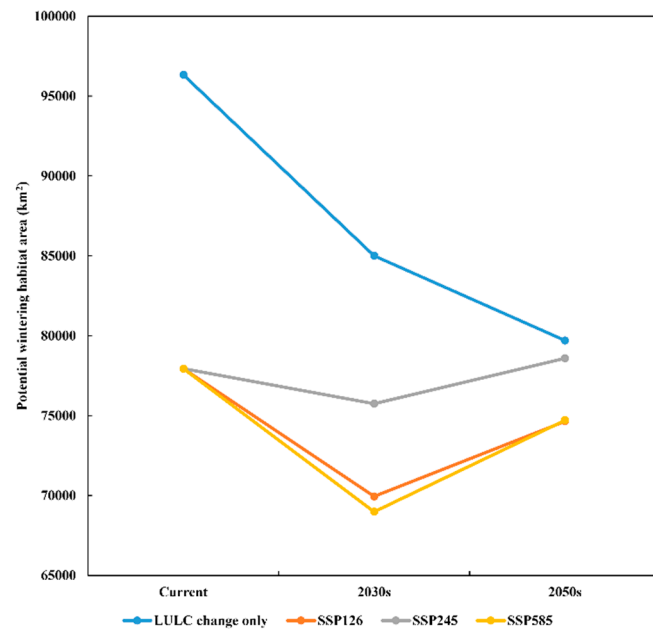

**Figure S2.** Changes in the area of potential wintering habitat under different future scenarios
